# Supplementary material for: Autonomous metabolic reprogramming and oxidative stress characterize endothelial dysfunction in acute myocardial infarction
Source: eLife journal article supplement (doi:10.7554/elife.86260), 2023-11-28
Supplement: repstand1 [file elife-86260-repstand1-v2.pdf]

Zodda et al.

## **Reporting Checklist**

*Biospecimen reporting for improved study quality (BRISQ)* (Moore HM et al., DOI: 10.1002/cncy.20147)

### **Biospecimen type**

*Blood vessels*

### **Anatomical site**

*Coronary arteries*

### **Disease status of patients**

*Cardiovascular disease*

### **Clinical characteristics of patients**

*Acute myocardial infarction patients*

### **Vital State of patients**

*Alive*

### **Clinical diagnosis of patients**

*Acute myocardial infarction*

### **Pathology diagnosis**

*Acute myocardial infarction*

### **Collection mechanism**

*Coronary artery catheterization*

### **Type of stabilization**

*Heparin*

### **Type of long-term preservation**

*Ex vivo culture*

**Constitution of preservative**

*Complete endothelial culture medium (cell culture) and CECM+10% dimethyl sulfoxide (cryopreservation at -80 °C)*

**Storage temperature**

*37 °C (cell culture), -80 °C or liquid nitrogen (cryopreserved samples).*

**Storage duration**

*In culture: 72 h. Cryopreserved (liquid nitrogen): indefinite.*

**Shipping temperature**

*-170 °C*

**Composition assessment & selection**

*100% endothelial cells*
